# S1 APPENDIX

## Supporting methods, figures and tables

|                                                                                                                             |    |
|-----------------------------------------------------------------------------------------------------------------------------|----|
| SUPPORTING METHODS .....                                                                                                    | 1  |
| Data sources.....                                                                                                           | 1  |
| Selection of genetic variants for P-wave duration score .....                                                               | 1  |
| Selection of genetic variants for PR interval duration score.....                                                           | 1  |
| Selection of genetic variants for QT interval score .....                                                                   | 2  |
| Selection of genetic variants for ion channel scores.....                                                                   | 2  |
| Explained variance and power calculations.....                                                                              | 2  |
| Sensitivity Analyses .....                                                                                                  | 3  |
| Qualitative evaluation of pleiotropic effects.....                                                                          | 3  |
| Genetically determined risk of atrial fibrillation and effect on 12-lead ECG parameters .....                               | 3  |
| Software .....                                                                                                              | 3  |
| SUPPORTING FIGURES .....                                                                                                    | 4  |
| Fig A. Generation of main analyses datasets .....                                                                           | 5  |
| Fig B. Genetic variant selection details .....                                                                              | 6  |
| Fig C. Distribution of genetic scores in the UK Biobank population .....                                                    | 7  |
| Fig D. Effects of genetically determined ECG parameters on risk of 'lone' atrial fibrillation in UK Biobank .....           | 8  |
| Fig E. Funnel plot for SNPs in P-wave duration score .....                                                                  | 9  |
| Fig F. Funnel plot for SNPs in PR interval score .....                                                                      | 10 |
| Fig G. Funnel plot for SNPs in QT interval score.....                                                                       | 11 |
| SUPPORTING TABLES .....                                                                                                     | 12 |
| Table A. Phenotype definition of atrial fibrillation in UK Biobank.....                                                     | 13 |
| Table B. Phenotype definitions of other diseases in UK Biobank .....                                                        | 14 |
| Table C. SNPs included in P-wave duration score .....                                                                       | 15 |
| Table D. SNPs included in PR interval score .....                                                                           | 16 |
| Table E. SNPs included in QT interval score.....                                                                            | 18 |
| Table F. Power calculations for genetic ECG scores.....                                                                     | 20 |
| Table G. SNPs included in atrial fibrillation score.....                                                                    | 21 |
| Table H. Baseline characteristics of participants with supraventricular tachycardias in UK Biobank.....                     | 25 |
| Table I. Effect of atrial fibrillation genetic risk score on 12-lead ECG parameters.....                                    | 26 |
| Table J. Sensitivity analyses for genetically predicted effects of ECG parameters on atrial fibrillation in UK Biobank..... | 27 |
| Table K. Phenoscanner derived details for non-ECG parameter associated traits for SNPs in ECG scores .....                  | 28 |
| SUPPORTING REFERENCES.....                                                                                                  | 30 |

## SUPPORTING METHODS

### Data sources

For participants in England, data from in-patient hospital admissions was obtained from Hospital Episode Statistics for England (NHS digital) from 1996 – 31<sup>st</sup> March 2017, with information on cause of death from NHS Digital from April 2006 – 31<sup>st</sup> January 2018. For participants in Wales, data from in-patient hospital admissions was obtained from the Patient Episode Database for Wales (Secure Anonymised Information Linkage, Wales) from 1999 – 29<sup>th</sup> February 2016, with information on cause of death from NHS Digital from April 2006 – 31<sup>st</sup> January 2018. For participants in Scotland, data from in-patient hospital admissions was obtained from the Scottish Morbidity Record (Information and Statistics Division, Scotland) from 1996 – 31<sup>st</sup> October 2016 with information on cause of death provided by the same organisation from April 2006 -30<sup>th</sup> November 2016. See [http://biobank.ctsu.ox.ac.uk/crystal/exinfo.cgi?src=Data\\_providers\\_and\\_dates](http://biobank.ctsu.ox.ac.uk/crystal/exinfo.cgi?src=Data_providers_and_dates) for further details.

### Selection of genetic variants for P-wave duration score

A large-scale genome-wide association study (GWAS) meta-analysis for P-wave duration identified 9 individual single nucleotide polymorphisms (SNPs) that met genome-wide significance in nearly 38,000 individuals of European ancestry from a variety of studies, but not including UK Biobank [1]. Briefly, all studies used in the GWAS meta-analysis excluded participants with AF, an implanted pacemaker, Wolff-Parkinson-White syndrome, complete heart block and those who received medications altering atrioventricular nodal conduction ( $\beta$ -blockers, dihydropyridine calcium channel blockers, Vaughan-Williams class I and III anti-arrhythmic medications and digoxin) as well as those in whom the P-wave duration could not be determined. In each cohort, P-wave duration was adjusted in a linear model for age, sex, RR interval and principal components of ancestry.

Taking the summary data from the meta-analysis, further clumping of SNPs was performed using linkage disequilibrium (LD) score of  $r^2 < 0.01$  within a  $\pm 250$ kb window using 1000 Genomes Phase 1 (EUR) reference data. One of the SNPs identified (rs148020424) was flagged as an insertion-deletion and was excluded from our score leaving 8 SNPs (**Table C**) that were included in our P-wave duration score.

### Selection of genetic variants for PR interval duration score

A large-scale GWAS meta-analysis for PR interval duration identified 61 individual SNPs that met genome-wide significance in over 92,000 individuals of European ancestry from a variety of studies, but not including UK Biobank [2]. Briefly, all studies used in the GWAS meta-analysis excluded participants with AF, history of myocardial infarction or heart failure, extreme PR interval values ( $\leq 80$ ms or  $\geq 320$ ms), Wolff-Parkinson-White syndrome, pacemaker implantation and use of  $\beta$ -blockers, Vaughan-Williams class I and III anti-arrhythmic medications or digoxin. In each cohort, age, sex, height, body mass index and principal components of genetic ancestry were included as covariates.

Taking the summary data from the meta-analysis, further clumping of SNPs was performed using LD score of  $r^2 < 0.01$  within a  $\pm 250$ kb window using 1000 Genomes Phase 1 (EUR) reference data. This yielded 52 SNPs (**Table D**) that were included in our PR interval score.

### Selection of genetic variants for QT interval score

A large-scale GWAS meta-analysis for QT interval included ~103,000 individuals of European ancestry from a variety of studies, but not including UK Biobank [3]. Additionally, an exome-chip sequencing GWAS was published including 95,626 individuals [4]. All studies used in both of the meta-analyses excluded participants with AF, QRS duration >120ms, bundle branch block, and, when available, electronic pacemaker use or QT-altering medication use. In each cohort, QT interval duration was adjusted for age, sex, RR interval and principal components of genetic ancestry and tested for association with 2.5million directly genotyped or imputed SNPs.

Taking the summary data from the meta-analysis and restricting to variants meeting GWAS significance, further clumping of SNPs was performed using LD score of  $r^2 < 0.01$  within a  $\pm 250$ kb window using 1000 Genomes Phase 1 (EUR) reference data. This yielded 54 SNPs (**Table E**) that were included in our QT interval score.

### Selection of genetic variants for ion channel scores

To test biological plausibility of the ECG scores, scores with genetic variants mapping to specific biological pathways involving electrical ion channels only were generated. To identify these in an unbiased way, the SNPnexus tool [5] was used to annotate the variants to known gene regions. Each variant in the main analysis was annotated to the closest gene within 25kb. Biological pathways were investigated using the Gene Ontology (GO) tool [6,7]. Variants that were annotated to genes involved in known biological pathways affecting action potential duration were included in the ion channel scores for each ECG parameter.

### Explained variance and power calculations

The strength of the genetic variants used was assessed by calculation of the explained variance ( $R^2$ ) of the trait using the following formula described elsewhere [8].

$$R^2 = \sum R_i^2 = \frac{\beta_i^2 \times \text{var}(SNP_i)}{\text{var}(X)}$$

where

$$\text{var}(SNP_i) = 2 \times MAF_{SNP_i} \times (1 - MAF_{SNP_i})$$

The total variance explained by the score is the sum of the individual variances explained by  $i$  SNPs within the score.  $\beta_i$  is the estimated effect of the  $i^{\text{th}}$  SNP on the ECG parameter;  $\text{var}(SNP_i)$  is calculated using the minor allele frequencies (MAF) of each SNP and  $\text{var}(X)$  is the variance of the ECG parameter. In this case  $\text{var}(X)$  was set as 1 standard deviation (SD) unit, from the reported SDs of the original population phenotypes in the GWAS.

To assess the potential for weak instrument bias,  $F$ -statistics for each SNP were calculated as  $\beta^2/SE^2$  as described elsewhere [9].

We used the online tool <https://sb452.shinyapps.io/power/> for power calculations for Mendelian Randomisation analyses. See **Table F** for further details.

## Sensitivity Analyses

### *Qualitative evaluation of pleiotropic effects*

For variants contained in each score, we used PhenoScanner (<http://www.phenoscanter.medschl.cam.ac.uk/information.html>) [10] to extract phenotypes with a screening  $P$ -value  $< 0.001$  and using proxies for any of the variants in the scores with  $r^2 > 0.8$  in 1000 Genomes Phase 3 data. We then limited our analysis to reports of GWAS significant  $P$ -values ( $< 5 \times 10^{-8}$ ) only. We selected the proxy with the highest  $r^2$  with the variant in the score for each individual trait described. In the case of multiple reports of the same trait, we selected the study with the strongest association described to report (i.e. smallest  $P$ -value). We examined these for consistent associations with known confounders.

### *Genetically determined risk of atrial fibrillation and effect on 12-lead ECG parameters*

To generate an AF genetic risk score for the bi-directional analysis, we used the latest large-scale GWAS for AF including 60,620 cases of AF and 970,216 controls of predominantly European ancestry from a variety of studies [11]. As the discovery GWAS included UK Biobank as constituent study, we used weights for the individual SNPs published in the GWAS for the SNPs derived from studies with UK Biobank excluded. Data with UK Biobank excluded weights was available for 142 SNPs reaching GWAS significance ( $P < 5 \times 10^{-8}$ ).

Taking the summary data from the meta-analysis, further clumping of SNPs was performed using LD score of  $r^2 < 0.01$  within a  $\pm 250$ kb window using 1000 Genomes Phase 1 (EUR) reference data. This yielded 133 SNPs (**Table G**) that were included in the AF risk score.

In UK Biobank, genetic scores were calculated for each participant by summing the number of AF risk increasing alleles of each SNP weighted by their effect size on the AF risk (unit ln odds). Effects of the AF risk score on 12-lead ECG parameters were estimated using linear regression adjusted for sex, genotyping array and forty principal components of ancestry (as provided by UK Biobank), with effects reported per unit ln odds ( $\sim 2.7$  OR increase).

### *Software*

We used the R package Mendelian Randomization (v0.4.0 - <https://cran.r-project.org/web/packages/MendelianRandomization/index.html>) to generate inverse variance weighted estimates, weighted median estimates and MR-Egger estimates. The weighted mode based estimate function was obtained from GitHub (<https://github.com/MRCIEU/mbe>). The MR-PRESSO R package (<https://github.com/rondolab/MR-PRESSO>) was used to exclude outlying genetic variants as described previously [12]. The R package metafor (v2.0.0 - <http://www.metafor-project.org/doku.php>) was used for meta-analysis.

## **SUPPORTING FIGURES**

**Fig A. Generation of main analyses datasets**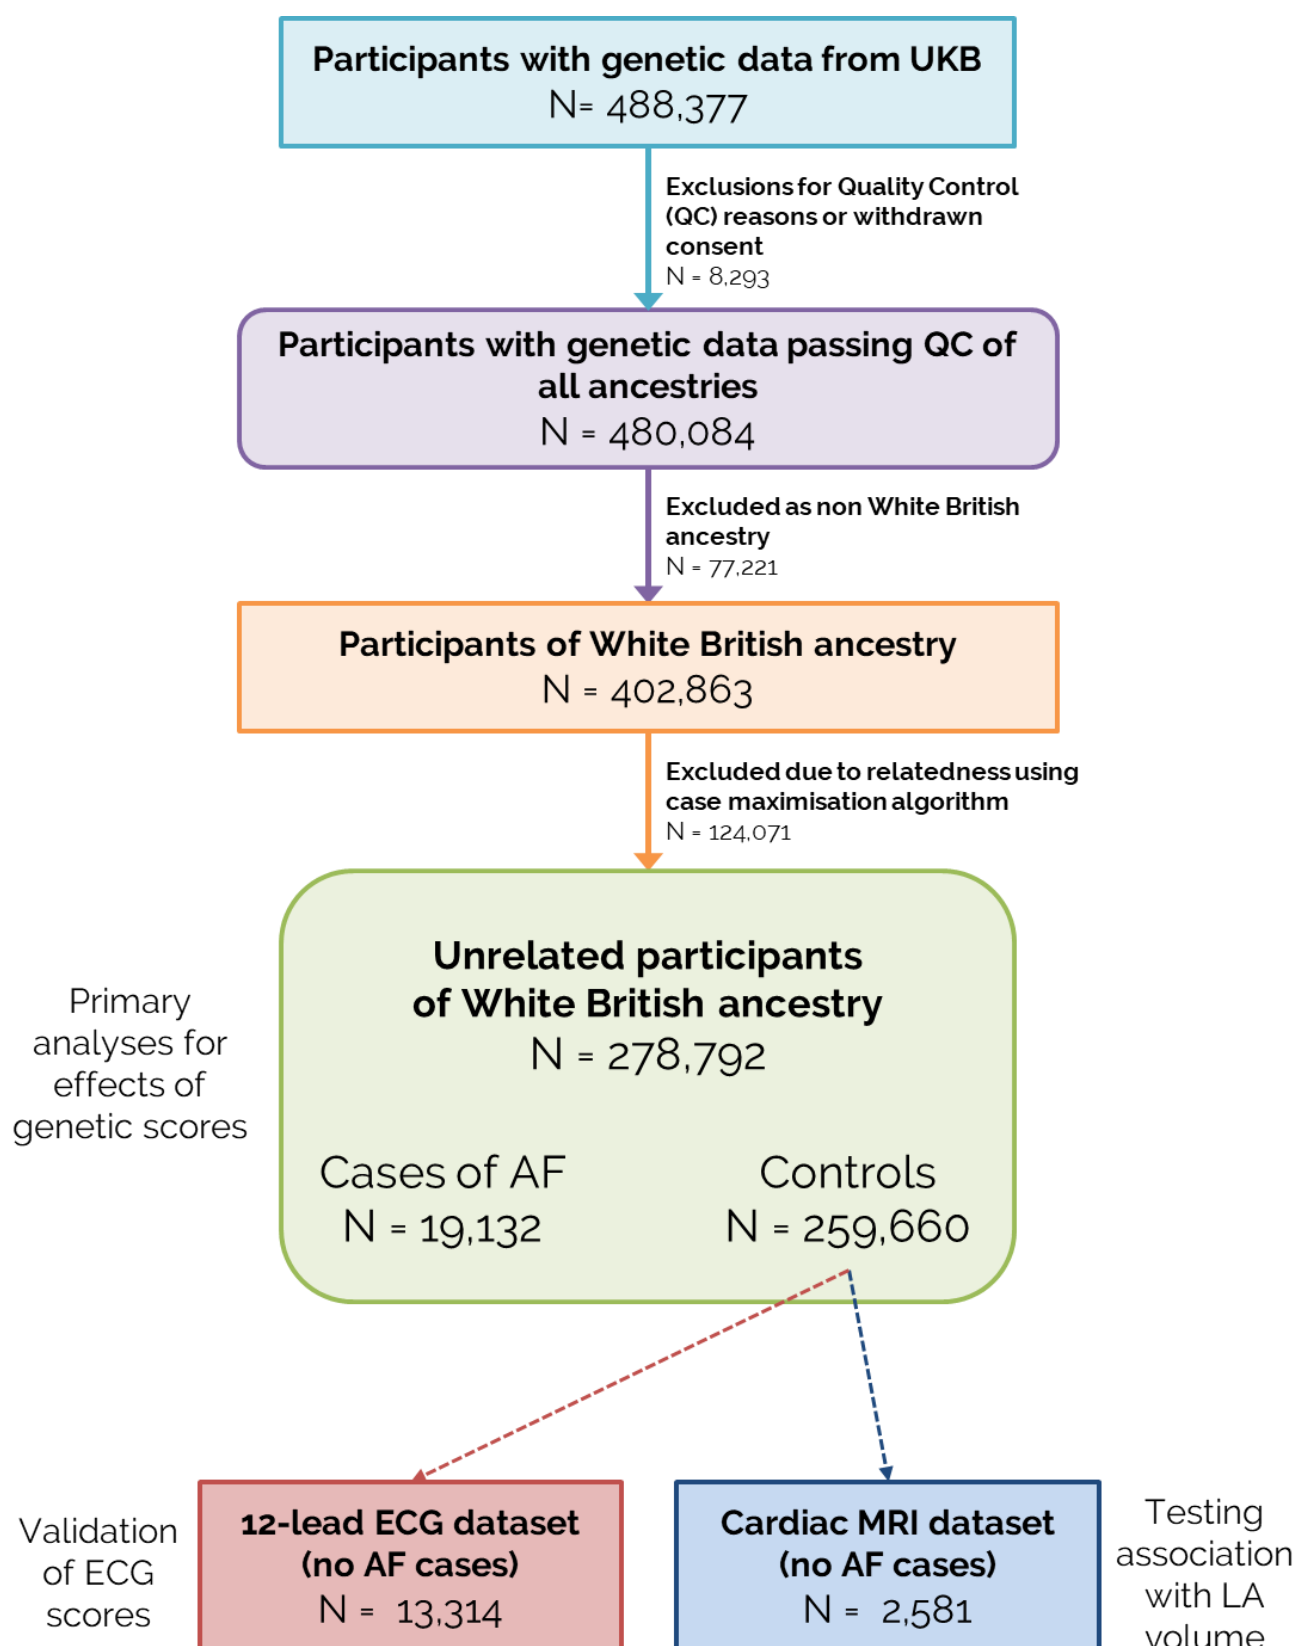

AF: Atrial fibrillation; ECG: Electrocardiogram; LA: Left atrium; MRI: Magnetic resonance imaging; SVT: Supraventricular tachycardia; UKB: UK Biobank

**Fig B. Genetic variant selection details**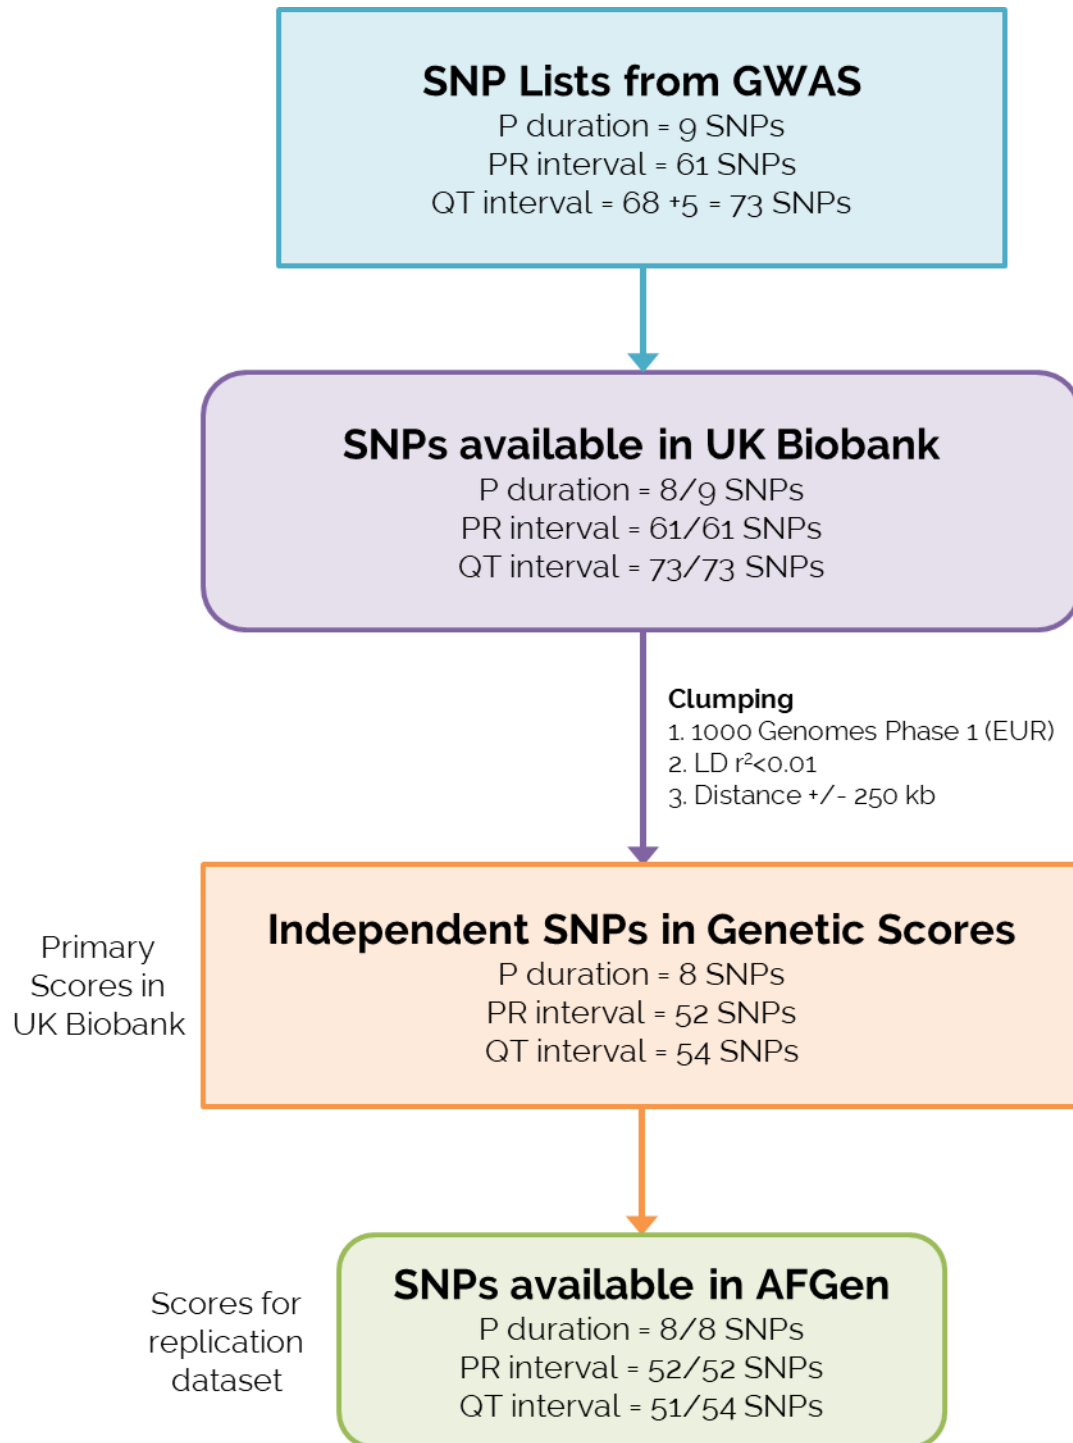

AF: Atrial fibrillation; GWAS: Genome wide association study; LD: Linkage disequilibrium; SNP: Single nucleotide polymorphism

**Fig C. Distribution of genetic scores in the UK Biobank population**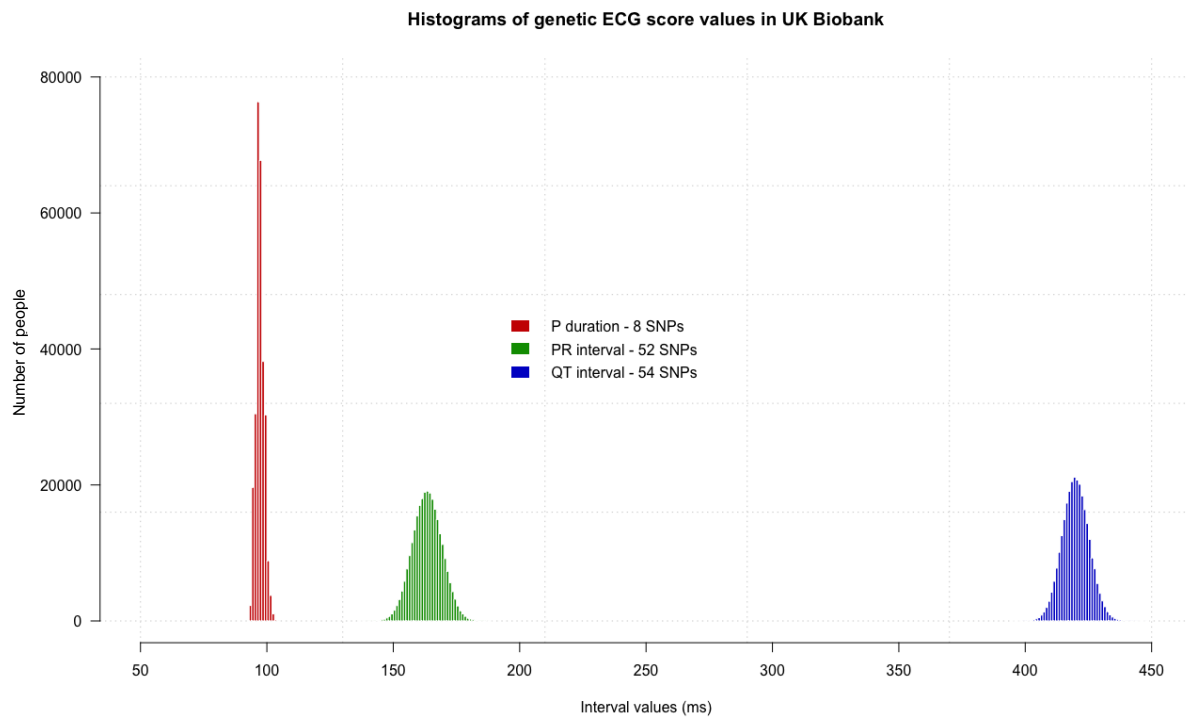

Weighted genetically predicted ECG score values.

Total number of people in each score is 278,792.

Mean  $\pm$  standard deviation of scores:

P duration:  $97.3 \pm 1.6$  ms

PR interval:  $163.4 \pm 5.8$  ms

QT interval:  $420.0 \pm 5.3$  ms

**Fig D. Effects of genetically determined ECG parameters on risk of 'lone' atrial fibrillation in UK Biobank**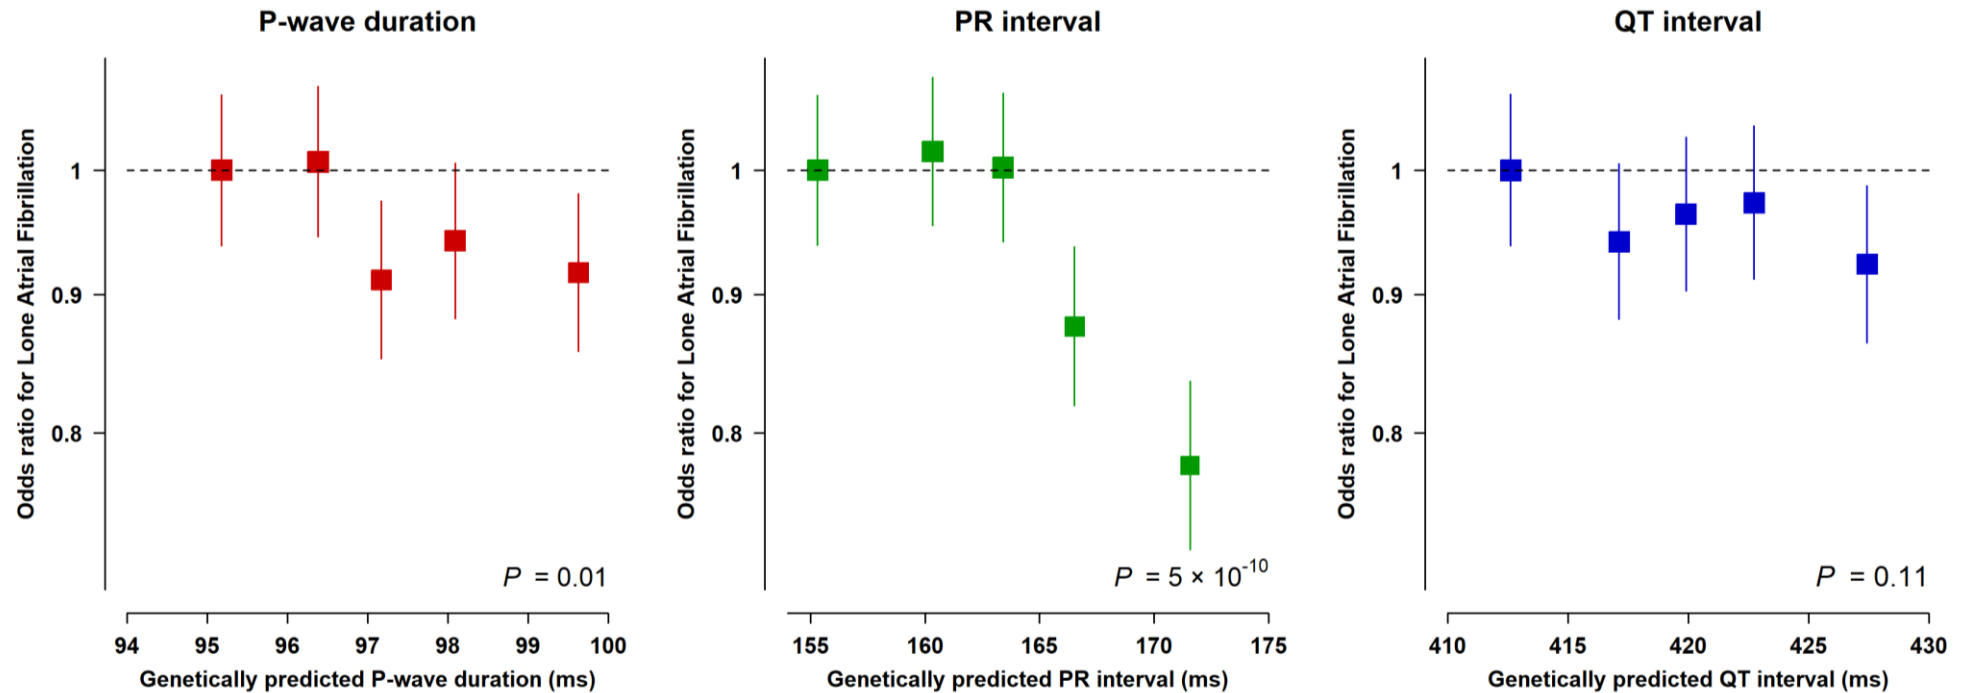

Odds ratios (OR) for 'lone' atrial fibrillation per quintile of genetic score (defined in non-AF cases) in 278,792 participants in UK Biobank. Boxes represent effect estimates with their size inversely proportional to variance. Solid lines represent 95% confidence intervals (CI) calculated using floating absolute risks. ORs are adjusted for genotyping array, sex and forty principal components of ancestry.  $P$  calculated across continuous genetic score values adjusting for sex, genotyping array and forty principal components of ancestry.

**Fig E. Funnel plot for SNPs in P-wave duration score**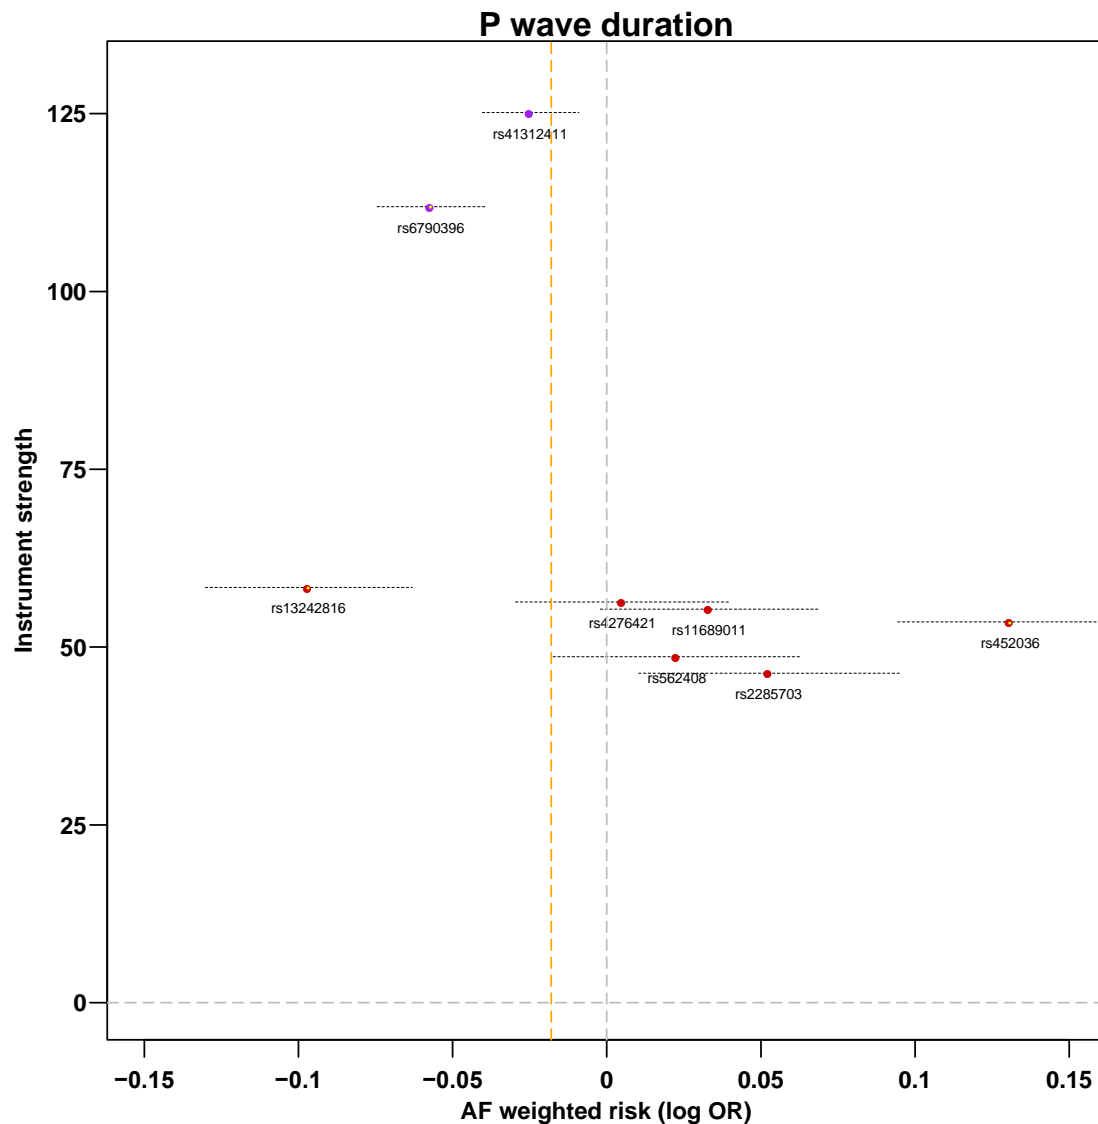

Funnel plot showing individual single nucleotide polymorphism (SNP) effects on atrial fibrillation (AF) expressed as log odds ratio (OR) estimates from UK Biobank data vs. strength of SNP in genetic P-wave duration score (effect on P-wave duration / standard error of estimate of effect on AF). Orange dotted line is the overall effect estimate for the score, red circles represent SNPs in P-wave duration score, purple circles represent SNPs in ion channel sub-score, inner yellow circles represent a SNP excluded by MR-PRESSO method.



**Fig G. Funnel plot for SNPs in QT interval score**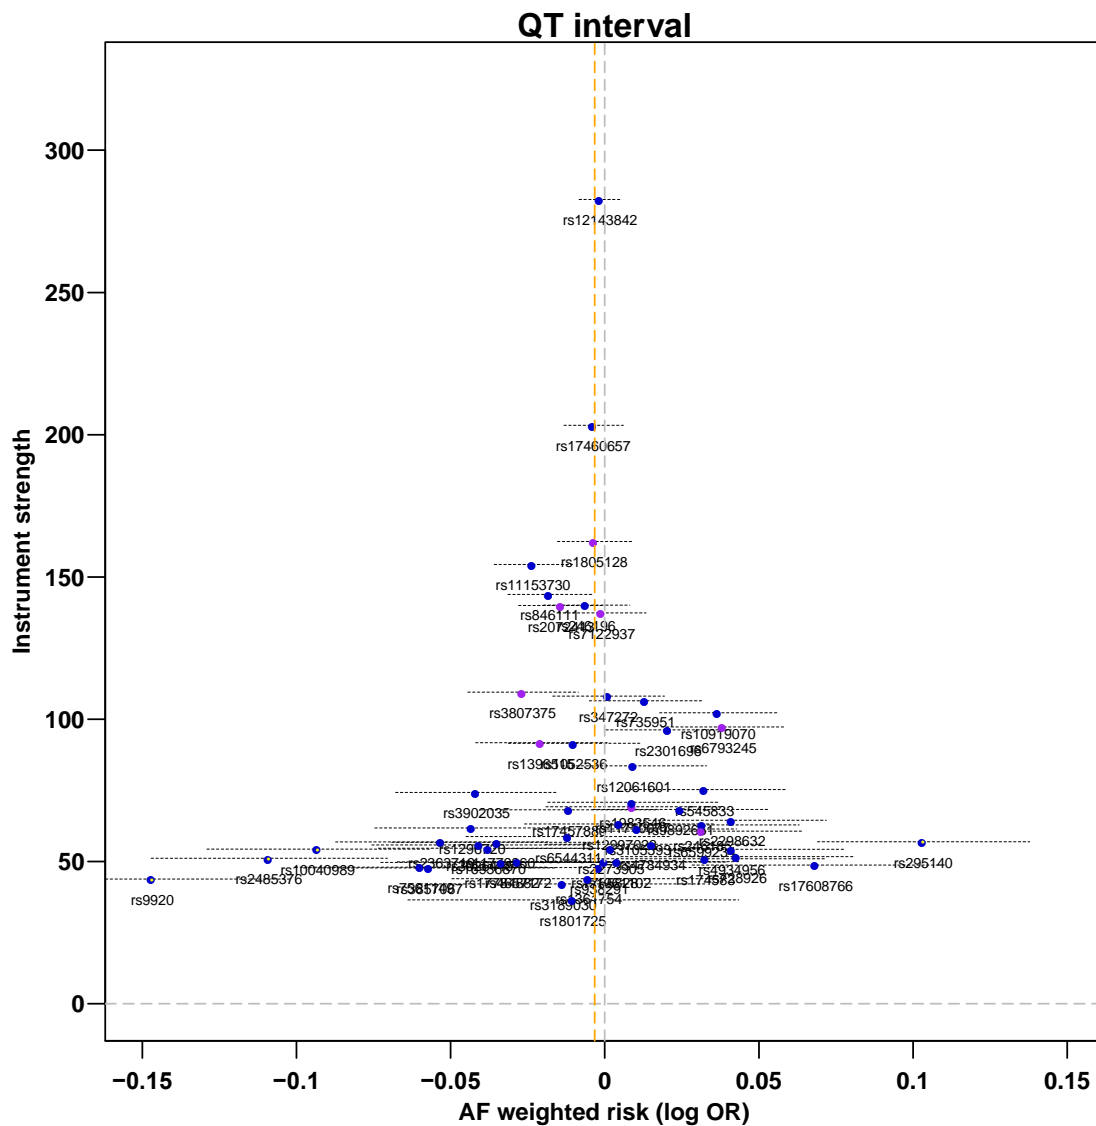

Funnel plot showing individual single nucleotide polymorphism (SNP) effects on atrial fibrillation (AF) expressed as log odds ratio (OR) estimates from UK Biobank data vs. strength of SNP in genetic QT interval score (effect on QT interval / standard error of estimate of effect on AF). Orange dotted line is the overall effect estimate for the score, blue circles represent SNPs in QT interval score, purple circles represent SNPs in ion channel sub-score, inner yellow circles represent a SNP excluded by MR-PRESSO method.

## **SUPPORTING TABLES**

**Table A. Phenotype definition of atrial fibrillation in UK Biobank**

| <b>Field</b> | <b>Description</b>                              | <b>Algorithm elements</b>                                                                                                                                                                                                                                                                                                                                                                                                                                                                                                                                                                                                                                         |
|--------------|-------------------------------------------------|-------------------------------------------------------------------------------------------------------------------------------------------------------------------------------------------------------------------------------------------------------------------------------------------------------------------------------------------------------------------------------------------------------------------------------------------------------------------------------------------------------------------------------------------------------------------------------------------------------------------------------------------------------------------|
| 20002        | Non-cancer illness code, self-reported          | Atrial Fibrillation – 1471, Atrial Flutter – 1483                                                                                                                                                                                                                                                                                                                                                                                                                                                                                                                                                                                                                 |
| 20004        | Operation code                                  | Cardiac Ablation – 1553, Cardioversion – 1524                                                                                                                                                                                                                                                                                                                                                                                                                                                                                                                                                                                                                     |
| 41202        | Diagnoses – main ICD10                          | Atrial Fibrillation or Flutter – I48*                                                                                                                                                                                                                                                                                                                                                                                                                                                                                                                                                                                                                             |
| 41204        | Diagnoses – secondary ICD10                     | Atrial Fibrillation or Flutter – I48*                                                                                                                                                                                                                                                                                                                                                                                                                                                                                                                                                                                                                             |
| 41200        | Operative procedures – main OPCS                | K22.3 Exclusion of left atrial appendage,<br>K57.1 Percutaneous transluminal ablation of atrioventricular node,<br>K57.5 Percutaneous transluminal ablation of atrial wall,<br>K62.1 Percutaneous transluminal ablation of pulmonary vein to left atrium conducting system,<br>K62.2 Percutaneous transluminal ablation of atrial wall for atrial flutter,<br>K62.3 Percutaneous transluminal ablation of conducting system of heart for atrial flutter,<br>K62.4 Percutaneous transluminal internal cardioversion,<br>K62.5 Percutaneous transluminal occlusion of left atrial appendage,<br>X50.1 Direct current cardioversion,<br>X50.2 External cardioversion |
| 41210        | Operative procedures – secondary OPCS           | K22.3 Exclusion of left atrial appendage,<br>K57.1 Percutaneous transluminal ablation of atrioventricular node,<br>K57.5 Percutaneous transluminal ablation of atrial wall,<br>K62.1 Percutaneous transluminal ablation of pulmonary vein to left atrium conducting system,<br>K62.2 Percutaneous transluminal ablation of atrial wall for atrial flutter,<br>K62.3 Percutaneous transluminal ablation of conducting system of heart for atrial flutter,<br>K62.4 Percutaneous transluminal internal cardioversion,<br>K62.5 Percutaneous transluminal occlusion of left atrial appendage,<br>X50.1 Direct current cardioversion,<br>X50.2 External cardioversion |
| 40001        | Underlying (primary) cause of death: ICD10      | Atrial Fibrillation or Flutter – I48*                                                                                                                                                                                                                                                                                                                                                                                                                                                                                                                                                                                                                             |
| 40002        | Contributory (secondary) causes of death: ICD10 | Atrial Fibrillation or Flutter – I48*                                                                                                                                                                                                                                                                                                                                                                                                                                                                                                                                                                                                                             |

\*Indicates all ICD10 sub-codes under main heading included

**Table B. Phenotype definitions of other diseases in UK Biobank**

| <b>Disease</b>               | <b>Code type</b> | <b>Codes and description</b>                                                                                                                                                                                                                                                                                                                                                                                                                                                                                                                                                                                            |
|------------------------------|------------------|-------------------------------------------------------------------------------------------------------------------------------------------------------------------------------------------------------------------------------------------------------------------------------------------------------------------------------------------------------------------------------------------------------------------------------------------------------------------------------------------------------------------------------------------------------------------------------------------------------------------------|
| Supraventricular tachycardia | ICD10            | Preexcitation syndrome – I45.6<br>Supraventricular tachycardia – I47.1<br>Atrial premature depolarisation – I49.1                                                                                                                                                                                                                                                                                                                                                                                                                                                                                                       |
|                              | OPCS             | Open division of accessory pathway within heart – K52.4<br>Percutaneous transluminal ablation of conducting system of heart NEC – K57.2<br>Percutaneous transluminal ablation of accessory pathway – K57.4                                                                                                                                                                                                                                                                                                                                                                                                              |
|                              | Self-reported    | Illness codes – 1484, 1487                                                                                                                                                                                                                                                                                                                                                                                                                                                                                                                                                                                              |
| Coronary Heart Disease       | ICD10            | Angina – I20*<br>Acute Myocardial Infarction – I21*<br>Subsequent Myocardial Infarction – I22*<br>Certain current complications following acute myocardial infarction – I23*<br>Other acute ischaemic heart diseases – I24*<br>Chronic ischaemic heart disease – I25*                                                                                                                                                                                                                                                                                                                                                   |
|                              | OPCS             | Transluminal balloon angioplasty of coronary artery – K49*<br>Other therapeutic transluminal operations on coronary artery – K50*<br>Percutaneous transluminal balloon angioplasty and insertion of stent into coronary artery – K75*<br>Saphenous vein graft replacement of coronary artery – K40*<br>Other autograft replacement of coronary artery – K41*<br>Allograft replacement of coronary artery – K42*<br>Prosthetic replacement of coronary artery – K43*<br>Other replacement of coronary artery – K44*<br>Connection of thoracic artery to coronary artery – K45*<br>Other bypass of coronary artery – K46* |
|                              | Self-reported    | Illness codes - 1074, 1075<br>Operation codes – 1070, 1071, 1095                                                                                                                                                                                                                                                                                                                                                                                                                                                                                                                                                        |
| Heart failure                | ICD10            | Heart Failure – I50*<br>Hypertensive heart disease – I11.0<br>Hypertensive heart and renal disease – I13.0, I13.2                                                                                                                                                                                                                                                                                                                                                                                                                                                                                                       |
|                              | Self-reported    | Illness code – 1076                                                                                                                                                                                                                                                                                                                                                                                                                                                                                                                                                                                                     |
| Hypertension                 | ICD10            | Essential (primary) hypertension – I10*<br>Hypertensive heart disease – I11*<br>Hypertensive heart and renal disease – I13*<br>Secondary hypertension – I15*                                                                                                                                                                                                                                                                                                                                                                                                                                                            |
|                              | Self-reported    | Illness codes – 1065, 1072                                                                                                                                                                                                                                                                                                                                                                                                                                                                                                                                                                                              |
| Diabetes                     | ICD10            | Insulin-dependent diabetes mellitus – E10*<br>Non-insulin-dependent diabetes mellitus – E11*<br>Other specified diabetes mellitus – E13*<br>Unspecified diabetes mellitus – E14*                                                                                                                                                                                                                                                                                                                                                                                                                                        |
|                              | Self-reported    | Probable Type 1 and Type 2 Diabetes used from algorithm validated in UK Biobank data from Eastwood <i>et al.</i> , 2016. [13]                                                                                                                                                                                                                                                                                                                                                                                                                                                                                           |

\*Indicates all ICD10 sub-codes under main heading included

**Table C. SNPs included in P-wave duration score**

| SNP (rsID)  | Chromosome | Nearest gene locus | Coded allele | Non-coded allele | Weighting for score (ms) |
|-------------|------------|--------------------|--------------|------------------|--------------------------|
| rs562408    | 1          | <i>SSBP3</i>       | G            | A                | 0.53                     |
| rs11689011  | 2          | <i>EPAS1</i>       | T            | C                | 0.60                     |
| rs41312411* | 3          | <i>SCN5A</i>       | G            | C                | 1.91                     |
| rs6790396*† | 3          | <i>SCN10A</i>      | C            | G                | 1.22                     |
| rs2285703   | 4          | <i>CAMK2D</i>      | G            | A                | 0.56                     |
| rs4276421   | 5          | <i>HCN1</i>        | C            | T                | 0.61                     |
| rs13242816† | 7          | <i>CAV1/CAV2</i>   | T            | C                | 1.21                     |
| rs452036†   | 14         | <i>MYH6</i>        | A            | G                | 0.59                     |

SNP: Single nucleotide polymorphism

\*SNPs included in Ion Channel Score

†SNPs excluded by MR-PRESSO method

Weighting for score is per coded allele and reported unaltered from the GWAS [1]

**Table D. SNPs included in PR interval score**

| <b>SNP (rsID)</b> | <b>Chromosome</b> | <b>Nearest<br/>gene locus</b> | <b>Coded<br/>allele</b> | <b>Non-<br/>coded<br/>allele</b> | <b>Weighting for<br/>score (ms)</b> |
|-------------------|-------------------|-------------------------------|-------------------------|----------------------------------|-------------------------------------|
| rs11264339        | 1                 | <i>KRTCAP2</i>                | C                       | T                                | 0.709                               |
| rs12127701        | 1                 | <i>MYBPHL</i>                 | G                       | A                                | 1.668                               |
| rs397637          | 1                 | <i>OBSCN</i>                  | T                       | G                                | 0.769                               |
| rs4648819         | 1                 | <i>SKI</i>                    | A                       | G                                | 1.735                               |
| rs7538988         | 1                 | <i>EPS15</i>                  | T                       | C                                | 2.129                               |
| rs13018106        | 2                 | <i>FIGN</i>                   | G                       | C                                | 0.776                               |
| rs1873164         | 2                 | <i>CCDC141</i>                | A                       | G                                | 0.723                               |
| rs2732860         | 2                 | <i>TMEM182</i>                | A                       | G                                | 0.893                               |
| rs3856447         | 2                 | <i>ID2</i>                    | A                       | G                                | 1.218                               |
| rs4430933         | 2                 | <i>MEIS1</i>                  | A                       | G                                | 1.299                               |
| rs922984          | 2                 | <i>TTN</i>                    | T                       | C                                | 1.518                               |
| rs11708996*       | 3                 | <i>SCN5A</i>                  | C                       | G                                | 3.089                               |
| rs13087058        | 3                 | <i>PDZRN3</i>                 | T                       | C                                | 0.982                               |
| rs16858828        | 3                 | <i>PHLDB2</i>                 | C                       | A                                | 0.853                               |
| rs6441111         | 3                 | <i>CCNL1</i>                  | C                       | T                                | 0.817                               |
| rs6599234*        | 3                 | <i>SCN10A</i>                 | T                       | A                                | 2.000                               |
| rs6599250*        | 3                 | <i>SCN10A</i>                 | T                       | C                                | 3.765                               |
| rs7638853         | 3                 | <i>SENP2</i>                  | G                       | A                                | 0.685                               |
| rs900669          | 3                 | <i>FRMD4B</i>                 | A                       | T                                | 0.770                               |
| rs9826413         | 3                 | <i>EOMES</i>                  | T                       | A                                | 2.024                               |
| rs17446418        | 4                 | <i>CAMK2D</i>                 | G                       | T                                | 0.781                               |
| rs343849          | 4                 | <i>ARHGAP24</i>               | T                       | A                                | 2.074                               |
| rs3733409         | 4                 | <i>FAT1</i>                   | T                       | C                                | 0.949                               |
| rs255292          | 5                 | <i>BNIP1 /<br/>NKX2-5</i>     | A                       | C                                | 1.083                               |
| rs7729395         | 5                 | <i>PAM</i>                    | T                       | C                                | 2.361                               |
| rs11763856        | 7                 | <i>HERPUD2</i>                | T                       | C                                | 3.062                               |
| rs12673438        | 7                 | <i>TBX20</i>                  | G                       | T                                | 1.360                               |
| rs2129561         | 7                 | <i>MKLN1</i>                  | G                       | A                                | 0.973                               |
| rs3807989†        | 7                 | <i>CAV1</i>                   | A                       | G                                | 2.035                               |
| rs12678719        | 8                 | <i>ZFPM2</i>                  | G                       | C                                | 0.799                               |
| rs881301          | 8                 | <i>FGFR1</i>                  | C                       | T                                | 0.757                               |
| rs12257568        | 10                | <i>SH3PXD2A</i>               | T                       | C                                | 1.036                               |
| rs12359272        | 10                | <i>ALDH18A1</i>               | A                       | G                                | 1.019                               |
| rs12575413        | 11                | <i>NAV2</i>                   | A                       | G                                | 0.743                               |
| rs1372797         | 11                | <i>NAV2</i>                   | G                       | T                                | 1.067                               |
| rs652673          | 11                | <i>WNT11</i>                  | T                       | C                                | 0.827                               |
| rs11067104        | 12                | <i>TBX5</i>                   | G                       | C                                | 1.381                               |
| rs11067773        | 12                | <i>MED13L</i>                 | T                       | C                                | 1.297                               |

| SNP (rsID)              | Chromosome | Nearest gene locus | Coded allele | Non-coded allele | Weighting for score (ms) |
|-------------------------|------------|--------------------|--------------|------------------|--------------------------|
| rs17287293 <sup>†</sup> | 12         | <i>C12orf67</i>    | A            | G                | 2.179                    |
| rs1896312               | 12         | <i>TBX3</i>        | C            | T                | 1.604                    |
| rs35471                 | 12         | <i>TBX3</i>        | G            | A                | 0.686                    |
| rs6489953 <sup>†</sup>  | 12         | <i>TBX5</i>        | C            | T                | 1.227                    |
| rs6489974               | 12         | <i>TBX3</i>        | A            | G                | 0.973                    |
| rs2585897               | 13         | <i>XPO4</i>        | A            | G                | 1.222                    |
| rs718426                | 13         | <i>EFHA1</i>       | A            | G                | 1.158                    |
| rs9590974               | 13         | <i>LRCH1</i>       | C            | A                | 1.097                    |
| rs11465506              | 14         | <i>IL25</i>        | G            | A                | 6.433                    |
| rs17767398              | 14         | <i>SNORD56B</i>    | G            | C                | 0.951                    |
| rs365990 <sup>†</sup>   | 14         | <i>MYH6</i>        | A            | G                | 0.705                    |
| rs4901308               | 14         | <i>FERMT2</i>      | C            | T                | 0.835                    |
| rs904974                | 15         | <i>TLE3</i>        | T            | C                | 1.062                    |
| rs1984481               | 17         | <i>MYOCD</i>       | G            | C                | 0.810                    |

SNP: Single nucleotide polymorphism

\*SNPs included in Ion Channel Score

<sup>†</sup>SNPs excluded by MR-PRESSO method

Weighting for score is per coded allele and reported unaltered from the GWAS [2]

**Table E. SNPs included in QT interval score**

| <b>SNP (rsID)</b> | <b>Chromosome</b> | <b>Nearest gene locus</b> | <b>Coded allele</b> | <b>Non-coded allele</b> | <b>Weighting for score (ms)</b> |
|-------------------|-------------------|---------------------------|---------------------|-------------------------|---------------------------------|
| rs10919070        | 1                 | <i>ATP1B1</i>             | A                   | C                       | 1.68                            |
| rs12061601        | 1                 | <i>ATP1B1</i>             | T                   | C                       | 1.41                            |
| rs12143842        | 1                 | <i>NOS1AP</i>             | T                   | C                       | 3.50                            |
| rs1361754         | 1                 | <i>PM20D1</i>             | G                   | A                       | 0.47                            |
| rs17457880        | 1                 | <i>NOS1AP</i>             | G                   | A                       | 1.90                            |
| rs17460657        | 1                 | <i>NOS1AP</i>             | A                   | C                       | 4.60                            |
| rs1983546         | 1                 | <i>ATP1B1</i>             | A                   | G                       | 0.81                            |
| rs2298632         | 1                 | <i>TCEA3</i>              | T                   | C                       | 0.70                            |
| rs347272          | 1                 | <i>NOS1AP</i>             | A                   | G                       | 1.80                            |
| rs4657172         | 1                 | <i>NOS1AP</i>             | G                   | C                       | 0.81                            |
| rs545833          | 1                 | <i>ATP1B1</i>             | T                   | C                       | 0.90                            |
| rs846111          | 1                 | <i>RNF207</i>             | C                   | G                       | 1.73                            |
| rs12997023        | 2                 | <i>SLC8A1</i>             | T                   | C                       | 1.69                            |
| rs295140†         | 2                 | <i>SPATS2L</i>            | T                   | C                       | 0.61                            |
| rs6544311         | 2                 | <i>SLC8A1</i>             | A                   | C                       | 0.65                            |
| rs7561149         | 2                 | <i>TTN-CCDC141</i>        | T                   | C                       | 0.52                            |
| rs938291          | 2                 | <i>SP3</i>                | G                   | C                       | 0.53                            |
| rs11710077*       | 3                 | <i>SCN5A-SCN10A</i>       | T                   | A                       | 0.92                            |
| rs17784882        | 3                 | <i>C3ORF75</i>            | C                   | A                       | 0.54                            |
| rs1801725         | 3                 | <i>CASR</i>               | G                   | T                       | 0.58                            |
| rs6599234*        | 3                 | <i>SCN5A-SCN10A</i>       | A                   | T                       | 0.70                            |
| rs6793245*        | 3                 | <i>SCN5A-SCN10A</i>       | G                   | A                       | 1.12                            |
| rs2363719         | 4                 | <i>SLC4A4</i>             | A                   | G                       | 0.97                            |
| rs3857067         | 4                 | <i>SMARCAD1</i>           | T                   | A                       | 0.51                            |
| rs10040989†       | 5                 | <i>GFRA3</i>              | G                   | A                       | 0.85                            |
| rs11153730        | 6                 | <i>SLC35F1-PLN</i>        | C                   | T                       | 1.65                            |
| rs3902035         | 6                 | <i>SLC35F1-PLN</i>        | T                   | C                       | 0.85                            |
| rs7765828         | 6                 | <i>GMPR</i>               | G                   | C                       | 0.55                            |
| rs2072413*        | 7                 | <i>KCNH2</i>              | C                   | T                       | 1.68                            |
| rs3807375*        | 7                 | <i>KCNH2</i>              | T                   | C                       | 1.22                            |
| rs9920†           | 7                 | <i>CAV1</i>               | C                   | T                       | 0.79                            |
| rs11779860        | 8                 | <i>LAPTM4B</i>            | T                   | C                       | 0.61                            |
| rs16936870        | 8                 | <i>NCOA2</i>              | A                   | T                       | 0.99                            |
| rs1961102         | 8                 | <i>AZIN1</i>              | T                   | C                       | 0.57                            |
| rs2485376†        | 10                | <i>GBF1</i>               | G                   | A                       | 0.56                            |
| rs3189030         | 10                | <i>NRAP</i>               | G                   | A                       | 0.48                            |
| rs4934956         | 10                | <i>ZNF37A</i>             | T                   | C                       | 0.58                            |

| <b>SNP (rsID)</b> | <b>Chromosome</b> | <b>Nearest gene locus</b> | <b>Coded allele</b> | <b>Non-coded allele</b> | <b>Weighting for score (ms)</b> |
|-------------------|-------------------|---------------------------|---------------------|-------------------------|---------------------------------|
| rs174583          | 11                | <i>FADS2</i>              | C                   | T                       | 0.57                            |
| rs2301696*        | 11                | <i>KCNQ1</i>              | C                   | G                       | 1.14                            |
| rs7122937*        | 11                | <i>KCNQ1</i>              | T                   | C                       | 1.93                            |
| rs3026445         | 12                | <i>ATP2A2</i>             | C                   | T                       | 0.62                            |
| rs728926          | 13                | <i>KLF12</i>              | T                   | C                       | 0.57                            |
| rs2273905         | 14                | <i>ANKRD9</i>             | T                   | C                       | 0.61                            |
| rs3105593         | 15                | <i>USP50-TRPM7</i>        | T                   | C                       | 0.66                            |
| rs1296720         | 16                | <i>CREBBP</i>             | C                   | A                       | 0.83                            |
| rs246185          | 16                | <i>MKL2</i>               | C                   | T                       | 0.72                            |
| rs246196          | 16                | <i>CNOT1</i>              | T                   | C                       | 1.73                            |
| rs4784934         | 16                | <i>CNOT1</i>              | A                   | G                       | 0.67                            |
| rs735951          | 16                | <i>LITAF</i>              | G                   | A                       | 1.15                            |
| rs1052536         | 17                | <i>LIG3</i>               | C                   | T                       | 0.98                            |
| rs1396515*        | 17                | <i>KCNJ2</i>              | G                   | C                       | 0.98                            |
| rs17608766        | 17                | <i>GOSR2</i>              | C                   | T                       | 0.72                            |
| rs9892651         | 17                | <i>PRKCA</i>              | T                   | C                       | 0.74                            |
| rs1805128*        | 21                | <i>KCNE1</i>              | T                   | C                       | 7.42                            |

SNP: Single nucleotide polymorphism

\*SNPs included in Ion Channel Score

†SNPs excluded by MR-PRESSO method

Weighting for score is per coded allele and reported unaltered from the GWAS [3,4]

**Table F. Power calculations for genetic ECG scores**

| ECG score       | Number of SNPs | SD of ECG parameter* | % Variance explained <sup>†</sup> – $R^2$ | <i>F</i> -statistic per SNP <sup>‡</sup> – median (range) | Calculated power |
|-----------------|----------------|----------------------|-------------------------------------------|-----------------------------------------------------------|------------------|
| P-wave duration | 8              | 12 ms                | 1.8                                       | 43 (35 – 184)                                             | 79.6%            |
| PR interval     | 52             | 26 ms                | 5.0                                       | 40 (20 – 1110)                                            | 99.6%            |
| QT interval     | 54             | 23 ms                | 5.0                                       | 47 (24 – 1012)                                            | 99.6%            |

\*Standard deviation (SD) estimates from genome wide association studies

<sup>†</sup>Refers to % variance in measured ECG parameter explained by genetic variants in the score

<sup>‡</sup>Refers to *F*-statistic per single nucleotide polymorphism (SNP) included in each score. Calculated using  $(\text{Beta}^2/\text{SE}^2)$  [9]

Power calculated using online tool (<https://sb452.shinyapps.io/power/>) for a binary outcome, with sample size 278,792; ratio of cases:controls of 1:15; causal detection effect of 0.85 per SD unit and significance of  $P = 0.05$

**Table G. SNPs included in atrial fibrillation score**

| <b>SNP (rsID)</b> | <b>Chromosome</b> | <b>Nearest<br/>gene locus</b> | <b>Coded<br/>allele</b> | <b>Non-<br/>coded<br/>allele</b> | <b>Weighting for<br/>score<br/>(log odds)</b> |
|-------------------|-------------------|-------------------------------|-------------------------|----------------------------------|-----------------------------------------------|
| rs284277          | 1                 | <i>CASZ1</i>                  | C                       | T                                | 0.0357                                        |
| rs1545300         | 1                 | <i>KCND3</i>                  | G                       | C                                | 0.0822                                        |
| rs4073778         | 1                 | <i>CASQ2</i>                  | G                       | A                                | 0.0551                                        |
| rs79187193        | 1                 | <i>intergenic</i>             | A                       | G                                | 0.0425                                        |
| rs6689306         | 1                 | <i>IL6R</i>                   | T                       | C                                | 0.0679                                        |
| rs11264280        | 1                 | <i>intergenic</i>             | A                       | G                                | 0.0800                                        |
| rs72700114        | 1                 | <i>intergenic</i>             | T                       | C                                | 0.0533                                        |
| rs72700118        | 1                 | <i>intergenic</i>             | T                       | G                                | 0.0529                                        |
| rs577676          | 1                 | <i>intergenic</i>             | C                       | A                                | 0.0649                                        |
| rs10753933        | 1                 | <i>PPFIA4</i>                 | A                       | G                                | 0.0507                                        |
| rs4951258         | 1                 | <i>NUCKS1</i>                 | A                       | C                                | 0.0768                                        |
| rs7529220         | 1                 | <i>intergenic</i>             | C                       | T                                | 0.0295                                        |
| rs2885697         | 1                 | <i>SCMH1</i>                  | C                       | T                                | 0.0322                                        |
| rs11590635        | 1                 | <i>AGBL4</i>                  | C                       | T                                | 0.0677                                        |
| rs146518726       | 1                 | <i>intergenic</i>             | T                       | C                                | 0.1258                                        |
| rs28387148        | 2                 | <i>GYPC</i>                   | G                       | A                                | 0.0526                                        |
| rs67969609        | 2                 | <i>ncRNA_TEX41</i>            | A                       | G                                | 0.1731                                        |
| rs56181519        | 2                 | <i>intergenic</i>             | G                       | A                                | 0.1498                                        |
| rs2288327         | 2                 | <i>TTN</i>                    | C                       | T                                | 0.0327                                        |
| rs3820888         | 2                 | <i>SPATS2L</i>                | T                       | C                                | 0.0410                                        |
| rs35544454        | 2                 | <i>ERBB4</i>                  | A                       | C                                | 0.0924                                        |
| rs7578393         | 2                 | <i>KIF3C</i>                  | T                       | G                                | 0.1064                                        |
| rs11125871        | 2                 | <i>USP34</i>                  | G                       | T                                | 0.1784                                        |
| rs2540949         | 2                 | <i>CEP68</i>                  | A                       | G                                | 0.0784                                        |
| rs6747542         | 2                 | <i>GMCL1</i>                  | C                       | A                                | 0.0376                                        |
| rs72926475        | 2                 | <i>intergenic</i>             | C                       | T                                | 0.0309                                        |
| rs10804493        | 3                 | <i>PHLDB2</i>                 | T                       | C                                | 0.0369                                        |
| rs7650482         | 3                 | <i>CAND2</i>                  | T                       | C                                | 0.0995                                        |
| rs1278493         | 3                 | <i>PPP2R3A</i>                | G                       | A                                | 0.0327                                        |
| rs7612445         | 3                 | <i>GNB4</i>                   | C                       | T                                | 0.0553                                        |
| rs60902112        | 3                 | <i>XXYLT1</i>                 | G                       | T                                | 0.0931                                        |
| rs73041705        | 3                 | <i>THRB</i>                   | G                       | A                                | 0.0696                                        |
| rs7373065         | 3                 | <i>intergenic</i>             | G                       | A                                | 0.0637                                        |
| rs6790396         | 3                 | <i>SCN10A</i>                 | T                       | C                                | 0.0478                                        |
| rs34080181        | 3                 | <i>LRIG1</i>                  | C                       | T                                | 0.1196                                        |
| rs17005647        | 3                 | <i>FRMD4B</i>                 | A                       | G                                | 0.1439                                        |
| rs6771054         | 3                 | <i>EPHA3</i>                  | T                       | C                                | 0.0406                                        |
| rs10006327        | 4                 | <i>SLC9B1</i>                 | A                       | G                                | 0.1709                                        |
| rs244017          | 4                 | <i>intergenic</i>             | C                       | A                                | 0.3406                                        |
| rs67249485        | 4                 | <i>intergenic</i>             | G                       | A                                | 0.0357                                        |
| rs79399769        | 4                 | <i>intergenic</i>             | C                       | T                                | 0.0500                                        |

| <b>SNP (rsID)</b> | <b>Chromosome</b> | <b>Nearest<br/>gene locus</b> | <b>Coded<br/>allele</b> | <b>Non-<br/>coded<br/>allele</b> | <b>Weighting for<br/>score<br/>(log odds)</b> |
|-------------------|-------------------|-------------------------------|-------------------------|----------------------------------|-----------------------------------------------|
| rs1532170         | 4                 | <i>intergenic</i>             | T                       | C                                | 0.0669                                        |
| rs138311480       | 4                 | <i>intergenic</i>             | T                       | C                                | 0.0342                                        |
| rs114904067       | 4                 | <i>intergenic</i>             | C                       | T                                | 0.0439                                        |
| rs7687819         | 4                 | <i>ALPK1</i>                  | C                       | T                                | 0.0489                                        |
| rs6829664         | 4                 | <i>CAMK2D</i>                 | G                       | A                                | 0.0500                                        |
| rs10213171        | 4                 | <i>ARHGAP10</i>               | A                       | G                                | 0.0441                                        |
| rs10520260        | 4                 | <i>HAND2-AS1</i>              | T                       | C                                | 0.1025                                        |
| rs12648245        | 4                 | <i>intergenic</i>             | G                       | A                                | 0.0825                                        |
| rs1458038         | 4                 | <i>intergenic</i>             | A                       | T                                | 0.1577                                        |
| rs6596717         | 5                 | <i>intergenic</i>             | T                       | G                                | 0.0189                                        |
| rs337705          | 5                 | <i>KCNN2</i>                  | A                       | T                                | 0.0625                                        |
| rs2012809         | 5                 | <i>intergenic</i>             | A                       | G                                | 0.0704                                        |
| rs2040862         | 5                 | <i>WNT8A</i>                  | A                       | G                                | 0.0420                                        |
| rs6580277         | 5                 | <i>NR3C1</i>                  | T                       | G                                | 0.1010                                        |
| rs12188351        | 5                 | <i>SLIT3</i>                  | T                       | C                                | 0.0872                                        |
| rs6891790         | 5                 | <i>intergenic</i>             | C                       | A                                | 0.0432                                        |
| rs28439930        | 5                 | <i>intergenic</i>             | T                       | G                                | 0.0745                                        |
| rs3951016         | 6                 | <i>SLC35F1</i>                | G                       | C                                | 0.0409                                        |
| rs9401451         | 6                 | <i>intergenic</i>             | A                       | C                                | 0.0476                                        |
| rs13195459        | 6                 | <i>intergenic</i>             | G                       | T                                | 0.0403                                        |
| rs117984853       | 6                 | <i>UST</i>                    | G                       | A                                | 0.0680                                        |
| rs73366713        | 6                 | <i>ATXN1</i>                  | G                       | T                                | 0.0583                                        |
| rs34969716        | 6                 | <i>KDM1B</i>                  | G                       | A                                | 0.0371                                        |
| rs3176326         | 6                 | <i>CDKN1A</i>                 | A                       | G                                | 0.0651                                        |
| rs2031522         | 6                 | <i>intergenic</i>             | C                       | T                                | 0.0695                                        |
| rs11773845        | 7                 | <i>CAV1</i>                   | C                       | T                                | 0.0546                                        |
| rs55985730        | 7                 | <i>OPN1SW</i>                 | A                       | T                                | 0.1281                                        |
| rs55734480        | 7                 | <i>DGKB</i>                   | A                       | T                                | 0.0633                                        |
| rs7789146         | 7                 | <i>KCNH2</i>                  | C                       | A                                | 0.0510                                        |
| rs6462079         | 7                 | <i>CREB5</i>                  | C                       | T                                | 0.0599                                        |
| rs35005436        | 7                 | <i>GTF2I</i>                  | A                       | T                                | 0.0723                                        |
| rs56201652        | 7                 | <i>CDK6</i>                   | A                       | C                                | 0.0493                                        |
| rs35620480        | 8                 | <i>intergenic</i>             | C                       | T                                | 0.0246                                        |
| rs62521286        | 8                 | <i>FBXO32</i>                 | T                       | C                                | 0.0418                                        |
| rs4871397         | 8                 | <i>intergenic</i>             | G                       | C                                | 0.0829                                        |
| rs6994744         | 8                 | <i>PTK2</i>                   | T                       | A                                | 0.0362                                        |
| rs7508            | 8                 | <i>UTR3/ASAH1</i>             | A                       | G                                | 0.0344                                        |
| rs7834729         | 8                 | <i>XPO7</i>                   | C                       | G                                | 0.0397                                        |
| rs2274115         | 9                 | <i>LHX3</i>                   | T                       | C                                | 0.0446                                        |
| rs10821415        | 9                 | <i>C9orf3</i>                 | A                       | G                                | 0.0419                                        |
| rs55693294        | 10                | <i>NEURL1</i>                 | G                       | T                                | 0.0782                                        |
| rs11598047        | 10                | <i>NEURL1</i>                 | C                       | T                                | 0.0576                                        |
| rs35176054        | 10                | <i>SH3PXD2A</i>               | G                       | A                                | 0.0563                                        |

| <b>SNP (rsID)</b> | <b>Chromosome</b> | <b>Nearest gene locus</b> | <b>Coded allele</b> | <b>Non-coded allele</b> | <b>Weighting for score (log odds)</b> |
|-------------------|-------------------|---------------------------|---------------------|-------------------------|---------------------------------------|
| rs10749053        | 10                | <i>RBM20</i>              | C                   | T                       | 0.0977                                |
| rs12245149        | 10                | <i>REEP3</i>              | A                   | C                       | 0.0270                                |
| rs7096385         | 10                | <i>SIRT1</i>              | T                   | C                       | 0.0388                                |
| rs60212594        | 10                | <i>SYNPO2L</i>            | G                   | A                       | 0.1131                                |
| rs10458660        | 10                | <i>C10orf11</i>           | A                   | G                       | 0.0519                                |
| rs4935786         | 11                | <i>intergenic</i>         | C                   | T                       | 0.0510                                |
| rs76097649        | 11                | <i>KCNJ5</i>              | G                   | A                       | 0.0759                                |
| rs10741807        | 11                | <i>NAV2</i>               | C                   | A                       | 0.0356                                |
| rs883079          | 12                | <i>UTR3/TBX5</i>          | T                   | C                       | 0.0788                                |
| rs10773657        | 12                | <i>HIP1R</i>              | A                   | G                       | 0.1536                                |
| rs6560886         | 12                | <i>FBRSL1</i>             | A                   | G                       | 0.0440                                |
| rs4963776         | 12                | <i>intergenic</i>         | T                   | C                       | 0.1531                                |
| rs17380837        | 12                | <i>SSPN</i>               | T                   | A                       | 0.3422                                |
| rs12809354        | 12                | <i>PKP2</i>               | T                   | C                       | 0.0602                                |
| rs11614818        | 12                | <i>intergenic</i>         | G                   | C                       | 0.0604                                |
| rs2860482         | 12                | <i>NACA</i>               | G                   | C                       | 0.0764                                |
| rs71454237        | 12                | <i>intergenic</i>         | G                   | A                       | 0.0638                                |
| rs775498          | 12                | <i>BEST3</i>              | G                   | T                       | 0.0716                                |
| rs12426679        | 12                | <i>intergenic</i>         | C                   | A                       | 0.0330                                |
| rs35569628        | 13                | <i>CUL4A</i>              | T                   | C                       | 0.0680                                |
| rs9506925         | 13                | <i>intergenic</i>         | G                   | A                       | 0.0613                                |
| rs422068          | 14                | <i>MYH6</i>               | A                   | G                       | 0.0389                                |
| rs1957021         | 14                | <i>AKAP6</i>              | G                   | A                       | 0.0744                                |
| rs11156751        | 14                | <i>AKAP6</i>              | C                   | G                       | 0.1698                                |
| rs73241997        | 14                | <i>intergenic</i>         | A                   | C                       | 0.1162                                |
| rs2738413         | 14                | <i>SYNE2</i>              | G                   | C                       | 0.0658                                |
| rs74884082        | 14                | <i>DPF3</i>               | G                   | A                       | 0.0548                                |
| rs10873298        | 14                | <i>intergenic</i>         | T                   | C                       | 0.0465                                |
| rs147301839       | 15                | <i>GCOM1</i>              | G                   | A                       | 0.0923                                |
| rs7170477         | 15                | <i>HERC1</i>              | T                   | C                       | 0.1813                                |
| rs74022964        | 15                | <i>intergenic</i>         | T                   | C                       | 0.1079                                |
| rs12908004        | 15                | <i>intergenic</i>         | C                   | T                       | 0.0461                                |
| rs2759301         | 15                | <i>ABHD17C</i>            | A                   | G                       | 0.0711                                |
| rs4965430         | 15                | <i>IGF1R</i>              | C                   | T                       | 0.0686                                |
| rs118159104       | 16                | <i>CRAMP1</i>             | T                   | C                       | 0.0615                                |
| rs140185678       | 16                | <i>RPL3L</i>              | A                   | G                       | 0.0988                                |
| rs77316573        | 16                | <i>PGP</i>                | T                   | G                       | 0.0428                                |
| rs2359171         | 16                | <i>ZFH3</i>               | G                   | A                       | 0.0668                                |
| rs72811294        | 17                | <i>MYOCD</i>              | A                   | G                       | 0.0200                                |
| rs7225165         | 17                | <i>intergenic</i>         | T                   | C                       | 0.0383                                |
| rs11658278        | 17                | <i>ZPBP2</i>              | G                   | A                       | 0.0362                                |
| rs1563304         | 17                | <i>WNT3</i>               | G                   | A                       | 0.0568                                |
| rs9899183         | 17                | <i>TNFSF12</i>            | G                   | T                       | 0.0587                                |

| <b>SNP (rsID)</b> | <b>Chromosome</b> | <b>Nearest<br/>gene locus</b> | <b>Coded<br/>allele</b> | <b>Non-<br/>coded<br/>allele</b> | <b>Weighting for<br/>score<br/>(log odds)</b> |
|-------------------|-------------------|-------------------------------|-------------------------|----------------------------------|-----------------------------------------------|
| rs12604076        | 17                | <i>CYTH1</i>                  | G                       | A                                | 0.1136                                        |
| rs9953366         | 18                | <i>SMAD7</i>                  | A                       | C                                | 0.0388                                        |
| rs8088085         | 18                | <i>MEX3C</i>                  | T                       | C                                | 0.0872                                        |
| rs2834618         | 21                | <i>ncRNA_LINC01<br/>426</i>   | G                       | A                                | 0.0703                                        |
| rs464901          | 22                | <i>TUBA8</i>                  | T                       | C                                | 0.0365                                        |
| rs133902          | 22                | <i>MYO18B</i>                 | T                       | C                                | 0.0432                                        |

SNP: Single nucleotide polymorphism

AF: atrial fibrillation

Weighting for score is per coded allele and reported unaltered from the GWAS as natural log odds [11]

**Table H. Baseline characteristics of participants with supraventricular tachycardias in UK Biobank**

| Characteristic                       | No supraventricular tachycardias | Supraventricular tachycardias |
|--------------------------------------|----------------------------------|-------------------------------|
| Number of participants               | 275908                           | 2884                          |
| Age at recruitment (yr)              | 56.9 ± 8.0                       | 59.6 ± 7.3                    |
| Male sex                             | 129751 (47.0)                    | 1507 (52.3)                   |
| Body mass index (kg/m <sup>2</sup> ) | 27.4 ± 4.8                       | 27.8 ± 5.0                    |
| Coronary Heart Disease               | 25673 (9.3)                      | 956 (33.2)                    |
| Heart Failure                        | 6211 (2.3)                       | 455 (15.8)                    |
| Hypertension                         | 91964 (33.2)                     | 1566 (54.3)                   |
| Diabetes                             | 18940 (6.9)                      | 386 (13.4)                    |
| Atrial fibrillation                  | 17412 (6.3)                      | 1720 (59.6)                   |
| 'Lone' atrial fibrillation           | 4203 (1.5)                       | 602 (20.9)                    |

Population restricted to unrelated white British ancestry (see **Methods** for full details). Continuous variables are presented as mean ± standard deviation and categorical variables as number (%).

'Lone' atrial fibrillation defined as atrial fibrillation without known coronary heart disease, heart failure, hypertension or diabetes (see **Methods** for full definition).

**Table I. Effect of atrial fibrillation genetic risk score on 12-lead ECG parameters**

| <b>ECG parameter</b>                    | <b>Change in ECG parameter (ms) (95% CI)</b> | <b>P-value</b>     |
|-----------------------------------------|----------------------------------------------|--------------------|
|                                         | <i>per unit log odds higher AF risk</i>      |                    |
| <b>UK Biobank (13,314 participants)</b> |                                              |                    |
| P-wave duration                         | -1.1 (-1.7 to -0.5)                          | 4×10 <sup>-4</sup> |
| PR interval                             | -0.4 (-1.4 to 0.5)                           | 0.40               |
| QT <sub>c</sub> (Bazett)                | -1.1 (-2.0 to -0.2)                          | 0.02               |

Sensitivity analyses for bidirectional Mendelian randomisation analyses – i.e. effect of genetic risk score for atrial fibrillation (AF) on 12-lead ECG parameters in 13,314 participants with ECG data and no history of AF in UK Biobank. Effect on 12-lead ECG parameter in milliseconds (ms) and 95% confidence intervals (CI) presented per unit log odds (~2.7 OR) increase. *P* calculated using linear regression adjusting for sex, genotyping array and first forty principal components of ancestry.

**Table J. Sensitivity analyses for genetically predicted effects of ECG parameters on atrial fibrillation in UK Biobank**

|                                        | P-wave duration<br>per 5 ms |                    | PR interval<br>per 5 ms |                     | QT interval<br>per 5 ms |      |
|----------------------------------------|-----------------------------|--------------------|-------------------------|---------------------|-------------------------|------|
|                                        | OR* (95% CI)                | P                  | OR* (95% CI)            | P                   | OR* (95% CI)            | P    |
| <b>UK Biobank – 19,132 cases of AF</b> |                             |                    |                         |                     |                         |      |
| Primary genetic score                  | 0.91 (0.87-0.96)            | 2×10 <sup>-4</sup> | 0.94 (0.93-0.96)        | 2×10 <sup>-19</sup> | 0.98 (0.97-1.00)        | 0.02 |
| IVW estimate (fixed-effects)           | 0.92 (0.88-0.96)            | 3×10 <sup>-4</sup> | 0.94 (0.93-0.96)        | 3×10 <sup>-19</sup> | 0.98 (0.97-0.99)        | 0.02 |
| IVW estimate (random-effects)          | 0.92 (0.75-1.12)            | 0.40               | 0.94 (0.91-0.98)        | 1×10 <sup>-3</sup>  | 0.98 (0.95-1.01)        | 0.32 |
| Weighted Median MR estimate            | 0.87 (0.81-0.94)            | 4×10 <sup>-4</sup> | 0.93 (0.91-0.95)        | 4×10 <sup>-9</sup>  | 0.99 (0.97-1.01)        | 0.38 |
| Weighted Mode MR estimate              | 0.86 (0.79-0.93)            | 0.006              | 0.93 (0.91-0.96)        | 4×10 <sup>-7</sup>  | 0.98 (0.96-1.00)        | 0.11 |
| MR-Egger estimate                      | 0.64 (0.45-0.89)            | 0.009              | 0.93 (0.86-1.00)        | 0.06                | 0.98 (0.92-1.05)        | 0.57 |
| <i>Egger-intercept test</i>            | -                           | 0.02               | -                       | 0.69                | -                       | 0.99 |
| MR-PRESSO corrected estimate           | 0.98 (0.86-1.12)            | 0.79               | 0.95 (0.93-0.98)        | 8×10 <sup>-4</sup>  | 0.99 (0.96-1.02)        | 0.38 |

Sensitivity analyses for primary ECG score effects on atrial fibrillation (AF) in UK Biobank. Odds ratios (OR) and 95% confidence intervals (CI) presented per 5ms higher genetic ECG score but (\*) not applicable to Egger-intercept test. IVW: Inverse variance weighted; MR: Mendelian Randomisation; MR-PRESSO: Mendelian Randomisation Pleiotropy Residual Sum and Outlier

**Table K. Phenoscanner derived details for non-ECG parameter associated traits for SNPs in ECG scores**

| SNP in score                 | Reported SNP | r <sup>2</sup> with sentinel | Trait                                                              | First author    | PMID     | P-value   |
|------------------------------|--------------|------------------------------|--------------------------------------------------------------------|-----------------|----------|-----------|
| <b>P-wave duration score</b> |              |                              |                                                                    |                 |          |           |
| rs11689011                   | rs11894252   | 0.979                        | Renal cell carcinoma                                               | Purdue MP       | 21131975 | 9.11E-09  |
| rs13242816                   | rs7801950    | 0.911                        | Maternal transmission distortion                                   | Meyer           | 22377632 | 6.21E-19  |
| <b>PR interval score</b>     |              |                              |                                                                    |                 |          |           |
| rs12127701                   | rs12127701   | 1                            | LDL                                                                | GLGC            | 24097068 | 4.54E-36  |
|                              | rs12127701   | 1                            | Total cholesterol                                                  | GLGC            | 24097068 | 3.87E-26  |
| rs11264339                   | rs11264339   | 1                            | Serum magnesium                                                    | Meyer TE        | 20700443 | 2.50E-17  |
| rs7638853                    | rs7638853    | 1                            | Expression of SENP2 in brain cortex                                | Heinzen         | 19222302 | 1.83E-09  |
| rs12678719                   | rs12678719   | 1                            | Serum VEGF                                                         | Debette S       | 21757650 | 1.95E-10  |
| rs4901308                    | rs8008270    | 0.964                        | Prostate cancer                                                    | Eeles RA        | 23535732 | 2.00E-14  |
| <b>QT interval score</b>     |              |                              |                                                                    |                 |          |           |
| rs12061601                   | rs12061601   | 1                            | Normalized agkistrodon contortrix venom ratio in venous thrombosis | Oudot Mellakh T | 22443383 | 4.53E-16  |
| rs1361754                    | rs1361754    | 1                            | Chromosome Methylation levels in Neural Tissues                    | Gibbs J         | 20485568 | 2.44E-30  |
|                              | rs1361754    | 1                            | Differential expression of PM20D1 probe 2452744 in brain cortex    | Heinzen         | 19222302 | 2.92E-10  |
| rs1801725                    | rs1801725    | 1                            | Calcium levels                                                     | OSeaghdha CM    | 24068962 | 9.00E-86  |
| rs7765828                    | rs6459467    | 0.996                        | Blood metabolite levels                                            | Shin SY         | 24816252 | 2.00E-16  |
| rs3807375                    | rs3807375    | 1                            | Height                                                             | GIANT           | 25282103 | 7.20E-11  |
| rs2485376                    | rs2485376    | 1                            | Years of educational attainment                                    | SSGAC           | 27225129 | 4.63E-10  |
| rs7122937                    | rs7122937    | 1                            | Chromosome Methylation levels in Neural Tissues                    | Gibbs J         | 20485568 | 2.57E-24  |
| rs174583                     | rs174583     | 1                            | Serum LAPUFA                                                       | Kettunen J      | 22286219 | 1.33E-267 |
|                              | rs174583     | 1                            | Plasma docosapentaenoic acid levels                                | Lemaitre RN     | 21829377 | 4.17E-147 |
|                              | rs174583     | 1                            | PC aa C363, PC aa C364                                             | Illig T         | 20037589 | 6.40E-91  |
|                              | rs174583     | 1                            | Serum ratio of 1- PE (20:4/0:0)/ CHEBI:85670                       | Suhre K         | 21886157 | 3.10E-68  |
|                              | rs174583     | 1                            | LDL                                                                | GLGC            | 24097068 | 7.00E-41  |

| SNP in score | Reported SNP | r <sup>2</sup> with sentinel | Trait                                                                  | First author | PMID     | P-value  |
|--------------|--------------|------------------------------|------------------------------------------------------------------------|--------------|----------|----------|
|              | rs174583     | 1                            | Total cholesterol                                                      | GLGC         | 24097068 | 6.05E-38 |
|              | rs174583     | 1                            | Triglycerides                                                          | GLGC         | 24097068 | 8.38E-35 |
|              | rs174583     | 1                            | HDL                                                                    | GLGC         | 24097068 | 1.19E-26 |
|              | rs174583     | 1                            | Plasma stearic acid                                                    | Wu JH        | 23362303 | 9.91E-19 |
|              | rs174583     | 1                            | Fasting glucose                                                        | MAGIC        | 20081858 | 1.17E-08 |
|              | rs174576     | 0.979                        | Differential expression of FADS2 in peripheral blood mononuclear cells | Heinzen      | 19222302 | 6.51E-15 |
|              | rs174577     | 0.966                        | Iron status biomarkers transferrin levels                              | Benyamin B   | 25352340 | 2.00E-17 |
| rs246185     | rs246185     | 1                            | Height                                                                 | GIANT        | 25282103 | 2.00E-18 |
|              | rs246185     | 1                            | Age at menarche                                                        | ReproGen     | 25231870 | 6.80E-16 |
| rs17608766   | rs17608766   | 1                            | Gene expression of GOSR2 in liver                                      | ICBP         | 21909115 | 3.00E-24 |
|              | rs17608766   | 1                            | Blood pressure                                                         | Wain LV      | 21909110 | 6.00E-15 |
|              | rs17608766   | 1                            | Coronary artery disease                                                | Howson JMM   | 28530674 | 4.14E-08 |

Shown are the association results for all single nucleotide polymorphisms (SNPs) in the ECG genetic scores with  $r^2 > 0.8$  (1000 Genomes Phase 3 data) to one of the associated SNPs that achieved genome-wide significance of  $P < 5 \times 10^{-8}$  for any biomedical trait (excluding other ECG parameters – P-duration, PR interval, QRS duration, QT duration) as reported in catalogues of associations for European ancestry. Data retrieved via phenoscanner (<http://www.phenoscanner.medschl.cam.ac.uk/phenoscanner>) [10].

## SUPPORTING REFERENCES

1. Christophersen IE, Magnani JW, Yin X, Barnard J, Weng LC, Arking DE, et al. Fifteen genetic loci associated with the electrocardiographic P wave. *Circ Cardiovasc Genet.* 2017;10(4):e001667. doi: 10.1161/CIRCGENETICS.116.001667. PMID: 28794112.
2. van Setten J, Brody JA, Jamshidi Y, Swenson BR, Butler AM, Campbell H, et al. PR interval genome-wide association meta-analysis identifies 50 loci associated with atrial and atrioventricular electrical activity. *Nat Commun.* 2018;9(1):2904. doi: 10.1038/s41467-018-04766-9. PMID: 30046033.
3. Arking DE, Pulit SL, Crotti L, van der Harst P, Munroe PB, Koopmann TT, et al. Genetic association study of QT interval highlights role for calcium signaling pathways in myocardial repolarization. *Nat Genet.* 2014;46(8):826-36. doi: 10.1038/ng.3014. PMID: 24952745.
4. Bihlmeyer NA, Brody JA, Smith AV, Warren HR, Lin H, Isaacs A, et al. Exomechip-wide analysis of 95 626 individuals identifies 10 novel loci associated with QT and jt intervals. *Circ Genom Precis Med.* 2018;11(1):e001758. doi: 10.1161/CIRCGEN.117.001758. PMID: 29874175.
5. Dayem Ullah AZ, Oscanoa J, Wang J, Nagano A, Lemoine NR, Chelala C. SNPnexus: Assessing the functional relevance of genetic variation to facilitate the promise of precision medicine. *Nucleic Acids Res.* 2018;46(W1):W109-W13. doi: 10.1093/nar/gky399. PMID: 29757393.
6. Ashburner M, Ball CA, Blake JA, Botstein D, Butler H, Cherry JM, et al. Gene ontology: Tool for the unification of biology. The Gene Ontology Consortium. *Nat Genet.* 2000;25(1):25-9. doi: 10.1038/75556. PMID: 10802651.
7. The Gene Ontology Consortium. The Gene Ontology resource: 20 years and still going strong. *Nucleic Acids Res.* 2019;47(D1):D330-D8. doi: 10.1093/nar/gky1055. PMID: 30395331.
8. Mack S, Coassin S, Vaucher J, Kronenberg F, Lamina C, Apo AIVGC. Evaluating the causal relation of APOA-IV with disease-related traits - a bidirectional two-sample Mendelian randomization study. *Sci Rep.* 2017;7(1):8734. doi: 10.1038/s41598-017-07213-9. PMID: 28821713.
9. Li B, Martin EB. An approximation to the F distribution using the chi-square distribution. *Computational Statistics & Data Analysis.* 2002;40(1):21-6. doi: 10.1016/s0167-9473(01)00097-4.
10. Staley JR, Blackshaw J, Kamat MA, Ellis S, Surendran P, Sun BB, et al. Phenoscanner: A database of human genotype-phenotype associations. *Bioinformatics.* 2016;32(20):3207-9. doi: 10.1093/bioinformatics/btw373. PMID: 27318201.
11. Nielsen JB, Thorolfsdottir RB, Fritsche LG, Zhou W, Skov MW, Graham SE, et al. Biobank-driven genomic discovery yields new insight into atrial fibrillation biology. *Nat Genet.* 2018;50(9):1234-9. doi: 10.1038/s41588-018-0171-3. PMID: 30061737.
12. Verbanck M, Chen CY, Neale B, Do R. Detection of widespread horizontal pleiotropy in causal relationships inferred from Mendelian randomization between complex traits and diseases. *Nat Genet.* 2018;50(5):693-8. doi: 10.1038/s41588-018-0099-7. PMID: 29686387.
13. Eastwood SV, Mathur R, Atkinson M, Brophy S, Sudlow C, Flaig R, et al. Algorithms for the capture and adjudication of prevalent and incident diabetes in UK Biobank. *PLoS ONE.* 2016;11(9):e0162388. doi: 10.1371/journal.pone.0162388. PMID: 27631769.
